# Supplementary material
Source: publisher figshare collection journal article supplement (https://acs.figshare.com/ndownloader/files/4653970)
Supplement: Supplementary file 1 [file 4653970]

 
data_face 
 
_audit_creation_method            SHELXL-97 
_chemical_name_systematic 
; 
 ? 
; 
_chemical_name_common             'hydroxylamine methyl ester' 
_chemical_melting_point           ? 
_chemical_formula_moiety          
 'C23 H22 Br N O3' 
_chemical_formula_sum 
 'C23 H22 Br N O3' 
_chemical_formula_weight          440.33 
 
loop_ 
 _atom_type_symbol 
 _atom_type_description 
 _atom_type_scat_dispersion_real 
 _atom_type_scat_dispersion_imag 
 _atom_type_scat_source 
 'C'  'C'   0.0033   0.0016 
 'International Tables Vol C Tables 4.2.6.8 and 6.1.1.4' 
 'H'  'H'   0.0000   0.0000 
 'International Tables Vol C Tables 4.2.6.8 and 6.1.1.4' 
 'N'  'N'   0.0061   0.0033 
 'International Tables Vol C Tables 4.2.6.8 and 6.1.1.4' 
 'O'  'O'   0.0106   0.0060 
 'International Tables Vol C Tables 4.2.6.8 and 6.1.1.4' 
 'Br'  'Br'  -0.2901   2.4595 
 'International Tables Vol C Tables 4.2.6.8 and 6.1.1.4' 
 
_symmetry_cell_setting            orthorhombic 
_symmetry_space_group_name_H-M    P212121 
 
loop_ 
 _symmetry_equiv_pos_as_xyz 
 'x, y, z' 
 '-x+1/2, -y, z+1/2' 
 '-x, y+1/2, -z+1/2' 
 'x+1/2, -y+1/2, -z' 
 
_cell_length_a                    9.6263(2) 
_cell_length_b                    10.0188(2) 
_cell_length_c                    21.2036(4) 
_cell_angle_alpha                 90.00 
_cell_angle_beta                  90.00 
_cell_angle_gamma                 90.00 
_cell_volume                      2044.96(7) 
_cell_formula_units_Z             4 
_cell_measurement_temperature     296(2) 
_cell_measurement_reflns_used     9983 
_cell_measurement_theta_min       2.80 
_cell_measurement_theta_max       34.11 
 
_exptl_crystal_description        plate 
_exptl_crystal_colour             colorless 
_exptl_crystal_size_max           0.35 
_exptl_crystal_size_mid           0.24 
_exptl_crystal_size_min           0.22 
_exptl_crystal_density_meas       ? 
_exptl_crystal_density_diffrn     1.430 
_exptl_crystal_density_method     'not measured' 
_exptl_crystal_F_000              904 
_exptl_absorpt_coefficient_mu     2.033 
_exptl_absorpt_correction_type    analytical 
_exptl_absorpt_correction_T_min   ? 
_exptl_absorpt_correction_T_max   ? 
_exptl_absorpt_process_details    ? 
 
_exptl_special_details 
; 
 ? 
; 
 
_diffrn_ambient_temperature       296(2) 
_diffrn_radiation_wavelength      0.71073 
_diffrn_radiation_type            MoK\a 
_diffrn_radiation_source          'fine-focus sealed tube' 
_diffrn_radiation_monochromator   graphite 
_diffrn_measurement_device_type   'CCD area detector' 
_diffrn_measurement_method        'omega scans' 
_diffrn_detector_area_resol_mean  ? 
_diffrn_standards_number          ? 
_diffrn_standards_interval_count  ? 
_diffrn_standards_interval_time   ? 
_diffrn_standards_decay_%         ? 
_diffrn_reflns_number             28503 
_diffrn_reflns_av_R_equivalents   0.0415 
_diffrn_reflns_av_sigmaI/netI     0.0402 
_diffrn_reflns_limit_h_min        -12 
_diffrn_reflns_limit_h_max        15 
_diffrn_reflns_limit_k_min        -15 
_diffrn_reflns_limit_k_max        14 
_diffrn_reflns_limit_l_min        -33 
_diffrn_reflns_limit_l_max        31 
_diffrn_reflns_theta_min          1.92 
_diffrn_reflns_theta_max          34.47 
_reflns_number_total              8099 
_reflns_number_gt                 6844 
_reflns_threshold_expression      >2sigma(I) 
 
_computing_data_collection        'Bruker SMART' 
_computing_cell_refinement        'Bruker SMART' 
_computing_data_reduction         'Bruker SAINT' 
_computing_structure_solution     'SHELXS-97 (Sheldrick, 1990)' 
_computing_structure_refinement   'SHELXL-97 (Sheldrick, 1997)' 
_computing_molecular_graphics     'Bruker SHELXTL' 
_computing_publication_material   'Bruker SHELXTL' 
 
_refine_special_details 
; 
 Refinement of F^2^ against ALL reflections.  The weighted R-factor wR and 
 goodness of fit S are based on F^2^, conventional R-factors R are based 
 on F, with F set to zero for negative F^2^. The threshold expression of 
 F^2^ > 2sigma(F^2^) is used only for calculating R-factors(gt) etc. and is 
 not relevant to the choice of reflections for refinement.  R-factors based 
 on F^2^ are statistically about twice as large as those based on F, and R- 
 factors based on ALL data will be even larger. 
; 
 
_refine_ls_structure_factor_coef  Fsqd  
_refine_ls_matrix_type            full 
_refine_ls_weighting_scheme       calc  
_refine_ls_weighting_details 
 'calc w=1/[\s^2^(Fo^2^)+(0.0313P)^2^+0.0000P] where P=(Fo^2^+2Fc^2^)/3' 
_atom_sites_solution_primary      direct 
_atom_sites_solution_secondary    difmap 
_atom_sites_solution_hydrogens    geom 
_refine_ls_hydrogen_treatment     mixed 
_refine_ls_extinction_method      none 
_refine_ls_extinction_coef        ? 
_refine_ls_abs_structure_details 
 'Flack H D (1983), Acta Cryst. A39, 876-881' 
_refine_ls_abs_structure_Flack    0.000(4) 
_refine_ls_number_reflns          8099 
_refine_ls_number_parameters      261 
_refine_ls_number_restraints      0 
_refine_ls_R_factor_all           0.0367 
_refine_ls_R_factor_gt            0.0283 
_refine_ls_wR_factor_ref          0.0614 
_refine_ls_wR_factor_gt           0.0600 
_refine_ls_goodness_of_fit_ref    0.975 
_refine_ls_restrained_S_all       0.975 
_refine_ls_shift/su_max           1.417 
_refine_ls_shift/su_mean          0.023 
 
loop_ 
 _atom_site_label 
 _atom_site_type_symbol 
 _atom_site_fract_x 
 _atom_site_fract_y 
 _atom_site_fract_z 
 _atom_site_U_iso_or_equiv 
 _atom_site_adp_type 
 _atom_site_occupancy 
 _atom_site_symmetry_multiplicity 
 _atom_site_calc_flag 
 _atom_site_refinement_flags 
 _atom_site_disorder_assembly 
 _atom_site_disorder_group 
C23 C 1.03571(15) 0.53300(18) 0.46232(9) 0.0401(4) Uani 1 1 d . . . 
H23A H 1.0742 0.4747 0.4937 0.060 Uiso 1 1 calc R . . 
H23B H 1.1008 0.6029 0.4531 0.060 Uiso 1 1 calc R . . 
H23C H 1.0169 0.4832 0.4246 0.060 Uiso 1 1 calc R . . 
O3 O 0.90674(10) 0.59123(10) 0.48596(5) 0.0271(2) Uani 1 1 d . . . 
O2 O 0.81892(10) 0.38545(10) 0.49490(4) 0.0229(2) Uani 1 1 d . . . 
C22 C 0.80794(12) 0.50427(14) 0.50118(5) 0.0165(2) Uani 1 1 d . . . 
Br1 Br 0.760542(13) 0.506733(13) 0.844280(5) 0.02319(4) Uani 1 1 d . . . 
C1 C 0.66244(12) 0.51095(13) 0.76652(5) 0.0173(2) Uani 1 1 d . . . 
C4 C 0.53157(12) 0.51941(12) 0.64999(5) 0.0154(2) Uani 1 1 d . . . 
C3 C 0.52786(14) 0.62861(13) 0.69061(6) 0.0202(3) Uani 1 1 d . . . 
H3 H 0.4807 0.7054 0.6784 0.024 Uiso 1 1 calc R . . 
C5 C 0.46007(13) 0.52651(12) 0.58612(5) 0.0154(2) Uani 1 1 d . . . 
H5 H 0.4355(15) 0.6201(15) 0.5787(7) 0.019 Uiso 1 1 calc . . . 
C2 C 0.59333(14) 0.62498(14) 0.74911(6) 0.0220(3) Uani 1 1 d . . . 
H2 H 0.5903 0.6984 0.7759 0.026 Uiso 1 1 calc R . . 
C7 C 0.22305(11) 0.49178(12) 0.62603(5) 0.0154(2) Uani 1 1 d . . . 
C16 C 0.47743(12) 0.47789(13) 0.46920(6) 0.0182(3) Uani 1 1 d . . . 
O1 O 0.36449(10) 0.31158(9) 0.59707(4) 0.02062(19) Uani 1 1 d . . . 
H1 H 0.3385 0.2642 0.5678 0.031 Uiso 1 1 calc R . . 
C6 C 0.55531(12) 0.48246(13) 0.53158(5) 0.0165(2) Uani 1 1 d . . . 
H6 H 0.5875(14) 0.3918(15) 0.5409(6) 0.020 Uiso 1 1 calc . . . 
C11 C 0.04430(16) 0.44798(14) 0.70246(7) 0.0261(3) Uani 1 1 d . . . 
H11 H -0.0031 0.3879 0.7280 0.031 Uiso 1 1 calc R . . 
C13 C 0.68364(13) 0.57337(13) 0.52917(6) 0.0188(2) Uani 1 1 d . . . 
H13A H 0.6622 0.6519 0.5042 0.023 Uiso 1 1 calc R . . 
H13B H 0.7061 0.6027 0.5716 0.023 Uiso 1 1 calc R . . 
C12 C 0.15144(13) 0.40244(13) 0.66478(6) 0.0210(3) Uani 1 1 d . . . 
H12 H 0.1758 0.3126 0.6652 0.025 Uiso 1 1 calc R . . 
N1 N 0.32916(11) 0.44799(10) 0.58401(5) 0.0162(2) Uani 1 1 d . . . 
C8 C 0.18308(14) 0.62485(13) 0.62593(6) 0.0204(3) Uani 1 1 d . . . 
H8 H 0.2285 0.6851 0.5997 0.025 Uiso 1 1 calc R . . 
C10 C 0.00612(15) 0.58117(14) 0.70298(7) 0.0241(3) Uani 1 1 d . . . 
H10 H -0.0656 0.6108 0.7288 0.029 Uiso 1 1 calc R . . 
C14 C 0.60225(13) 0.40484(13) 0.66951(6) 0.0193(3) Uani 1 1 d . . . 
H14 H 0.6055 0.3308 0.6431 0.023 Uiso 1 1 calc R . . 
C15 C 0.66736(13) 0.40012(13) 0.72756(6) 0.0189(2) Uani 1 1 d . . . 
H15 H 0.7139 0.3234 0.7403 0.023 Uiso 1 1 calc R . . 
C17 C 0.46209(15) 0.35679(14) 0.43784(6) 0.0224(3) Uani 1 1 d . . . 
H17 H 0.5032 0.2803 0.4542 0.027 Uiso 1 1 calc R . . 
C9 C 0.07620(13) 0.66892(14) 0.66450(6) 0.0230(3) Uani 1 1 d . . . 
H9 H 0.0516 0.7587 0.6644 0.028 Uiso 1 1 calc R . . 
C21 C 0.41784(14) 0.59161(15) 0.44278(6) 0.0227(3) Uani 1 1 d . . . 
H21 H 0.4288 0.6737 0.4626 0.027 Uiso 1 1 calc R . . 
C20 C 0.34228(15) 0.58367(16) 0.38717(7) 0.0272(3) Uani 1 1 d . . . 
H20 H 0.3031 0.6603 0.3700 0.033 Uiso 1 1 calc R . . 
C19 C 0.32511(15) 0.46179(17) 0.35721(7) 0.0305(3) Uani 1 1 d . . . 
H19 H 0.2729 0.4560 0.3204 0.037 Uiso 1 1 calc R . . 
C18 C 0.38596(15) 0.34920(16) 0.38236(7) 0.0295(3) Uani 1 1 d . . . 
H18 H 0.3759 0.2675 0.3620 0.035 Uiso 1 1 calc R . . 
 
loop_ 
 _atom_site_aniso_label 
 _atom_site_aniso_U_11 
 _atom_site_aniso_U_22 
 _atom_site_aniso_U_33 
 _atom_site_aniso_U_23 
 _atom_site_aniso_U_13 
 _atom_site_aniso_U_12 
C23 0.0178(6) 0.0457(11) 0.0567(10) -0.0194(8) 0.0126(7) -0.0023(6) 
O3 0.0165(4) 0.0282(6) 0.0367(5) -0.0114(4) 0.0085(4) -0.0049(4) 
O2 0.0248(5) 0.0208(5) 0.0233(5) -0.0034(4) 0.0021(4) 0.0062(4) 
C22 0.0162(5) 0.0192(6) 0.0141(5) -0.0024(5) -0.0003(4) -0.0008(5) 
Br1 0.02894(7) 0.02418(7) 0.01645(5) -0.00264(5) -0.00199(5) 0.00141(6) 
C1 0.0157(5) 0.0193(6) 0.0169(5) -0.0032(5) 0.0025(4) -0.0032(5) 
C4 0.0147(5) 0.0150(6) 0.0165(5) -0.0032(5) 0.0035(4) -0.0020(4) 
C3 0.0209(6) 0.0175(6) 0.0221(6) -0.0048(5) 0.0001(5) 0.0038(5) 
C5 0.0164(5) 0.0131(6) 0.0167(5) -0.0033(4) 0.0043(4) -0.0017(4) 
C2 0.0232(6) 0.0215(7) 0.0213(6) -0.0079(5) 0.0009(5) 0.0016(5) 
C7 0.0150(5) 0.0181(5) 0.0129(4) -0.0009(4) 0.0001(4) -0.0017(5) 
C16 0.0177(5) 0.0198(7) 0.0170(5) -0.0018(5) 0.0069(4) -0.0037(5) 
O1 0.0237(5) 0.0121(4) 0.0261(5) -0.0058(4) 0.0020(4) -0.0024(3) 
C6 0.0177(5) 0.0144(6) 0.0175(5) -0.0047(5) 0.0041(4) -0.0014(5) 
C11 0.0274(8) 0.0247(7) 0.0262(7) 0.0033(6) 0.0099(6) -0.0046(6) 
C13 0.0186(6) 0.0152(6) 0.0225(6) -0.0045(5) 0.0054(5) -0.0021(5) 
C12 0.0223(6) 0.0176(6) 0.0231(6) 0.0017(5) 0.0045(5) -0.0024(5) 
N1 0.0180(5) 0.0127(5) 0.0180(5) -0.0019(4) 0.0032(4) -0.0019(4) 
C8 0.0185(6) 0.0204(7) 0.0224(6) 0.0036(5) 0.0045(5) 0.0008(5) 
C10 0.0190(6) 0.0284(8) 0.0250(7) -0.0019(6) 0.0088(6) 0.0009(5) 
C14 0.0225(6) 0.0143(6) 0.0210(6) -0.0055(5) 0.0020(5) -0.0016(5) 
C15 0.0189(6) 0.0154(6) 0.0224(6) -0.0004(5) 0.0007(5) -0.0001(5) 
C17 0.0240(7) 0.0203(7) 0.0228(6) -0.0049(5) 0.0066(6) -0.0058(5) 
C9 0.0206(6) 0.0201(6) 0.0284(7) 0.0001(5) 0.0037(6) 0.0032(5) 
C21 0.0218(7) 0.0235(7) 0.0228(6) -0.0035(5) 0.0061(5) -0.0004(5) 
C20 0.0196(7) 0.0381(9) 0.0239(7) 0.0041(6) 0.0048(6) 0.0015(6) 
C19 0.0217(7) 0.0498(10) 0.0200(6) -0.0043(6) 0.0025(5) -0.0066(6) 
C18 0.0305(8) 0.0337(9) 0.0243(7) -0.0109(6) 0.0059(6) -0.0114(6) 
 
_geom_special_details 
; 
 All esds (except the esd in the dihedral angle between two l.s. planes) 
 are estimated using the full covariance matrix.  The cell esds are taken 
 into account individually in the estimation of esds in distances, angles 
 and torsion angles; correlations between esds in cell parameters are only 
 used when they are defined by crystal symmetry.  An approximate (isotropic) 
 treatment of cell esds is used for estimating esds involving l.s. planes. 
; 
 
loop_ 
 _geom_bond_atom_site_label_1 
 _geom_bond_atom_site_label_2 
 _geom_bond_distance 
 _geom_bond_site_symmetry_2 
 _geom_bond_publ_flag 
C23 O3 1.4605(16) . ? 
O3 C22 1.3295(15) . ? 
O2 C22 1.2025(16) . ? 
C22 C13 1.5044(17) . ? 
Br1 C1 1.9006(11) . ? 
C1 C2 1.3726(18) . ? 
C1 C15 1.3847(18) . ? 
C4 C3 1.3929(16) . ? 
C4 C14 1.3970(17) . ? 
C4 C5 1.5209(16) . ? 
C3 C2 1.3918(18) . ? 
C5 N1 1.4862(17) . ? 
C5 C6 1.5403(15) . ? 
C7 C8 1.3877(17) . ? 
C7 C12 1.3969(17) . ? 
C7 N1 1.4247(15) . ? 
C16 C17 1.3914(18) . ? 
C16 C21 1.3932(19) . ? 
C16 C6 1.5210(16) . ? 
O1 N1 1.4352(14) . ? 
C6 C13 1.5357(17) . ? 
C11 C12 1.3822(19) . ? 
C11 C10 1.3841(19) . ? 
C8 C9 1.3865(18) . ? 
C10 C9 1.3761(19) . ? 
C14 C15 1.3822(17) . ? 
C17 C18 1.3880(19) . ? 
C21 C20 1.3877(19) . ? 
C20 C19 1.386(2) . ? 
C19 C18 1.378(2) . ? 
 
loop_ 
 _geom_angle_atom_site_label_1 
 _geom_angle_atom_site_label_2 
 _geom_angle_atom_site_label_3 
 _geom_angle 
 _geom_angle_site_symmetry_1 
 _geom_angle_site_symmetry_3 
 _geom_angle_publ_flag 
C22 O3 C23 115.44(11) . . ? 
O2 C22 O3 123.99(11) . . ? 
O2 C22 C13 124.69(11) . . ? 
O3 C22 C13 111.29(11) . . ? 
C2 C1 C15 121.57(11) . . ? 
C2 C1 Br1 119.51(9) . . ? 
C15 C1 Br1 118.86(10) . . ? 
C3 C4 C14 118.34(11) . . ? 
C3 C4 C5 120.15(11) . . ? 
C14 C4 C5 121.51(10) . . ? 
C2 C3 C4 121.27(12) . . ? 
N1 C5 C4 112.69(10) . . ? 
N1 C5 C6 109.29(9) . . ? 
C4 C5 C6 112.69(10) . . ? 
C1 C2 C3 118.74(12) . . ? 
C8 C7 C12 118.67(11) . . ? 
C8 C7 N1 119.58(11) . . ? 
C12 C7 N1 121.62(11) . . ? 
C17 C16 C21 118.50(12) . . ? 
C17 C16 C6 119.61(12) . . ? 
C21 C16 C6 121.87(11) . . ? 
C16 C6 C13 112.66(10) . . ? 
C16 C6 C5 111.60(9) . . ? 
C13 C6 C5 109.50(10) . . ? 
C12 C11 C10 121.40(13) . . ? 
C22 C13 C6 112.34(10) . . ? 
C11 C12 C7 119.78(12) . . ? 
C7 N1 O1 110.03(9) . . ? 
C7 N1 C5 115.22(9) . . ? 
O1 N1 C5 107.30(9) . . ? 
C9 C8 C7 120.71(12) . . ? 
C9 C10 C11 118.75(13) . . ? 
C15 C14 C4 120.85(11) . . ? 
C14 C15 C1 119.23(12) . . ? 
C18 C17 C16 120.59(14) . . ? 
C10 C9 C8 120.67(13) . . ? 
C20 C21 C16 120.70(13) . . ? 
C19 C20 C21 120.16(14) . . ? 
C18 C19 C20 119.52(13) . . ? 
C19 C18 C17 120.49(14) . . ? 
 
_diffrn_measured_fraction_theta_max    0.977 
_diffrn_reflns_theta_full              34.47 
_diffrn_measured_fraction_theta_full   0.977 
_refine_diff_density_max    0.630 
_refine_diff_density_min   -0.615 
_refine_diff_density_rms    0.059 
